# Supplementary material for: Increased 10-Year Prevalence of Huntington’s Disease in South Korea: An Analysis of Medical Expenditure Through the National Healthcare System
Source: PubMed Central journal article supplement — J Clin Neurol. 2023 Jan 17;19(2):147–55. doi: 10.3988/jcn.2022.0212 (PMC9982180; doi:10.3988/jcn.2022.0212), 2023-01-17
Supplement: jcn-19-147-s001.pdf [file jcn-19-147-s001.pdf]

**Supplementary Table 1.** Number of uses of each type of medical institution

|                                                             | 2010        | 2011        | 2012         | 2013         | 2014         | 2015         | 2016         | 2017         | 2018         | 2019         | Total         |
|-------------------------------------------------------------|-------------|-------------|--------------|--------------|--------------|--------------|--------------|--------------|--------------|--------------|---------------|
| Tertiary referral and general hospitals                     | 760 (42.1)  | 732 (37.1)  | 1,075 (50.0) | 1,137 (54.3) | 1,245 (54.4) | 1,371 (49.1) | 1,634 (54.5) | 1,547 (54.1) | 1,636 (54.8) | 1,863 (56.4) | 13,000 (51.5) |
| Hospitals, primary hospital, clinics, public health centers | 728 (40.3)  | 880 (44.6)  | 592 (44.6)   | 492 (27.5)   | 463 (20.2)   | 551 (19.7)   | 527 (17.6)   | 489 (17.1)   | 497 (16.7)   | 375 (11.4)   | 5,594 (22.2)  |
| Long-term-care hospitals                                    | 317 (17.6)  | 361 (18.3)  | 483 (18.3)   | 465 (22.5)   | 582 (25.4)   | 868 (31.1)   | 838 (27.9)   | 826 (28.9)   | 850 (28.5)   | 1,064 (32.2) | 6,654 (26.4)  |
| Total                                                       | 1,805 (100) | 1,973 (100) | 2,150 (100)  | 2,094 (100)  | 2,290 (100)  | 2,790 (100)  | 2,999 (100)  | 2,862 (100)  | 2,983 (100)  | 3,302 (100)  | 25,248 (100)  |

Data are *n* (%) values.
