# Supplementary material for: Increased 10-Year Prevalence of Huntington’s Disease in South Korea: An Analysis of Medical Expenditure Through the National Healthcare System
Source: PubMed Central journal article supplement — J Clin Neurol. 2023 Jan 17;19(2):147–55. doi: 10.3988/jcn.2022.0212 (PMC9982180; doi:10.3988/jcn.2022.0212), 2023-01-17
Supplement: jcn-19-147-s002.pdf [file jcn-19-147-s002.pdf]

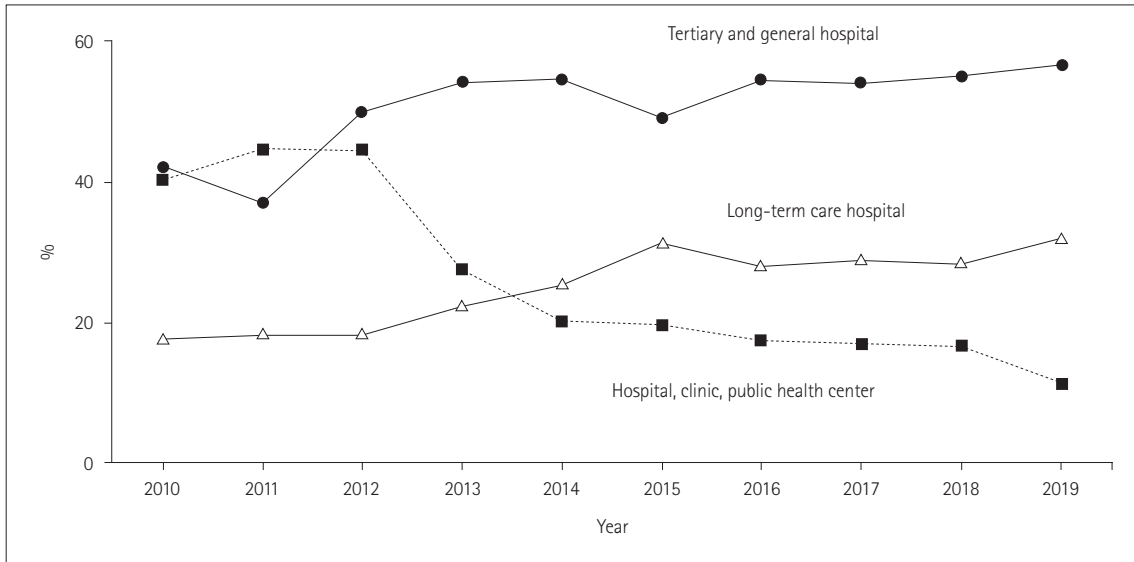

**Supplementary Fig. 1.** Number of uses of each medical institution category during 2010–2019. The total number of visits to medical institutions during the 10-year study period. The use of tertiary, general, and nursing hospitals increased ( $p$  for trend  $<0.001$ ), whereas that of hospitals, clinics, and public health centers decreased ( $p$  for trend  $<0.001$ ). Data are percentages of use in each category among the total use of medical institutions in each year.
