# Supplementary material for: Increased 10-Year Prevalence of Huntington’s Disease in South Korea: An Analysis of Medical Expenditure Through the National Healthcare System
Source: PubMed Central journal article supplement — J Clin Neurol. 2023 Jan 17;19(2):147–55. doi: 10.3988/jcn.2022.0212 (PMC9982180; doi:10.3988/jcn.2022.0212), 2023-01-17
Supplement: jcn-19-147-s003.pdf [file jcn-19-147-s003.pdf]

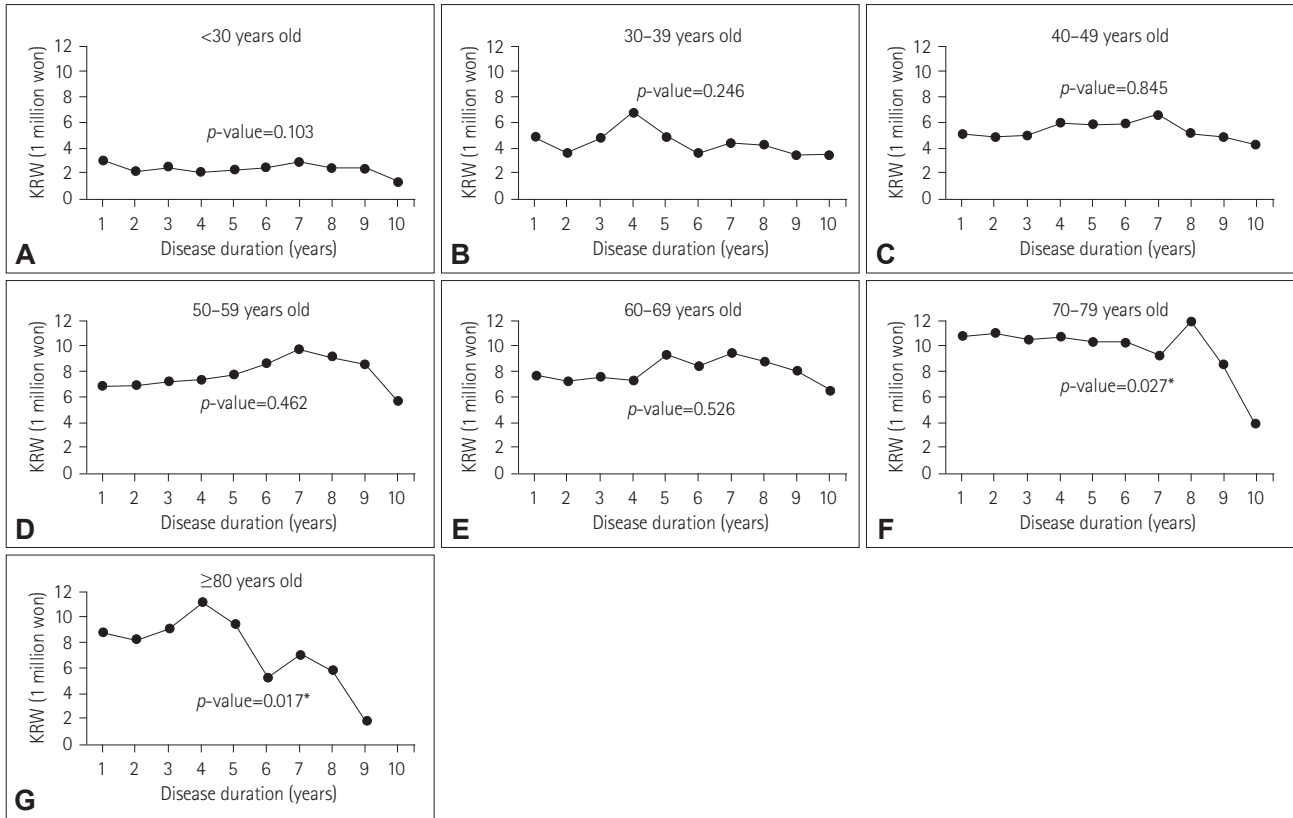

**Supplementary Fig. 2.** Medical expenditure in each age group according to the disease duration (A-G). The medical expenditure in each age group according to disease duration. \* $p < 0.05$ .
